# Supplementary material for: A versatile mathematical work-flow to explore how Cancer Stem Cell fate influences tumor progression
Source: Springer Nature journal article supplement (doi:10.1186/1752-0509-9-s3-s1), 2015-06-01

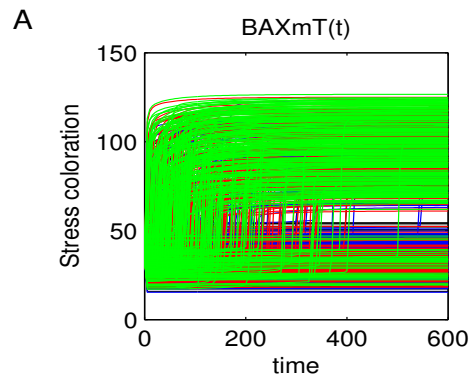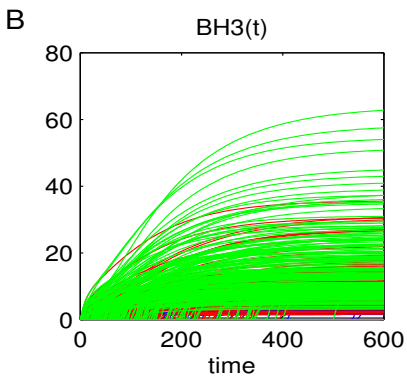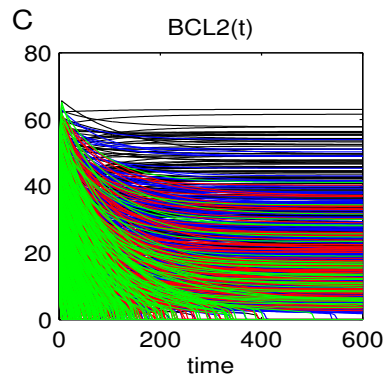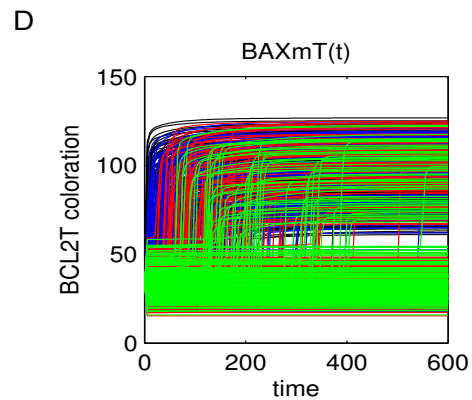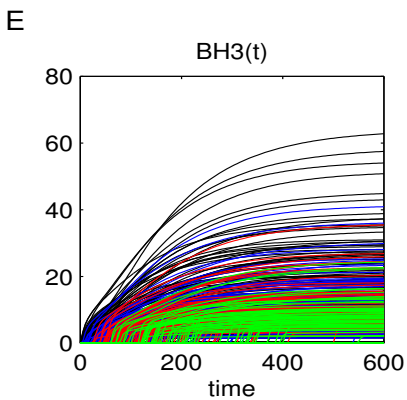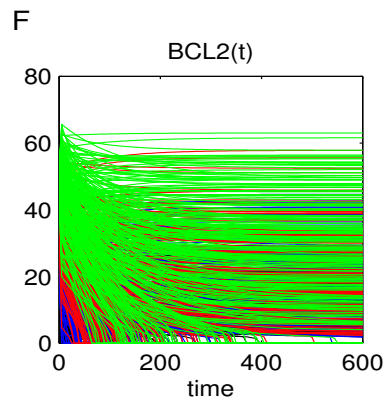

Supplement: 12918_2015_1463_MOESM7_ESM.pdf [file 12918_2015_1463_MOESM7_ESM.pdf]
